# Supplementary material for: Immune-Related Adverse Events (irAE) in Cancer Immune Checkpoint Inhibitors (ICI) and Survival Outcomes Correlation: To Rechallenge or Not?
Source: MDPI journal article supplement (doi:10.3390/cancers13050989), 2021-02-27
Supplement: s1 [file s1]

# Immune-Related Adverse Events (irAE) in Cancer Immune Checkpoint Inhibitors (ICI) and Survival Outcomes Correlation: To Rechallenge or Not?

Heidar J. Albandar, Jacob Fuqua, Jasim M. Albandar, Salahuddin Safi, Samuel A. Merrill and Patrick C. Ma

**Table S1.** Type of irAEs after Initial ICI Reinitiation.

| IrAE (n = 41)                  | n (%)  |
|--------------------------------|--------|
| Hypothyroidism/hyperthyroidism | 9 (22) |
| Diarrhea/colitis               | 8 (20) |
| Rash                           | 6 (15) |
| Pneumonitis                    | 5 (12) |
| Adrenal Insufficiency          | 4 (10) |
| Hepatitis                      | 4 (10) |
| Nephritis                      | 1 (2)  |
| Myalgia                        | 1 (2)  |
| Other **                       | 3 (7)  |

\*\* Other irAE included arthralgia, MAHA, and SIADH.

**Table S2.** Multivariable Cox Proportion Analysis of Overall Survival Comparing irAEs with or without Rechallenge vs Non-irAE Groups.

| Effect                  | Categories                                                 | Hazard Ratio * | Lower CI | Upper CI | p       |
|-------------------------|------------------------------------------------------------|----------------|----------|----------|---------|
| Group                   | No immune-related adverse events                           | Ref            |          |          |         |
|                         | IrAE and not rechallenged (non-reinitiated + interruption) | 0.40           | 0.22     | 0.52     | 0.0024  |
|                         | IrAE and rechallenged (reinitiated +/- interruption)       | 0.34           | 0.22     | 0.52     | <0.0001 |
| Age                     | ≤60Y                                                       | Ref            |          |          |         |
|                         | >60Y                                                       | 1.48           | 1.01     | 2.17     | 0.04    |
| Gender                  | Female                                                     | Ref            |          |          |         |
|                         | Male                                                       | 0.77           | 0.53     | 1.11     | 0.16    |
| Immunotherapy type      | Pembro/Nivo                                                | Ref            |          |          |         |
|                         | Ipi & Ipi/Nivo                                             | 1.89           | 0.88     | 3.47     | 0.1     |
|                         | Atezo/Durva/Avelu                                          | 0.98           | 0.47     | 2.04     | 0.95    |
| Antibiotic use          | No                                                         | Ref            |          |          |         |
|                         | Yes                                                        | 0.76           | 0.49     | 1.20     | 0.24    |
| ECOG Performance status | 0–1                                                        | Ref            |          |          |         |
|                         | >1                                                         | 2.00           | 1.35     | 2.98     | 0.0006  |
| Tumor Location          | Lung                                                       | Ref            |          |          |         |
|                         | Melanoma                                                   | 0.31           | 0.16     | 0.62     | 0.0008  |
|                         | Other                                                      | 0.84           | 0.55     | 1.28     | 0.41    |

\* Ref: Reference for hazard ratio analysis and comparison.

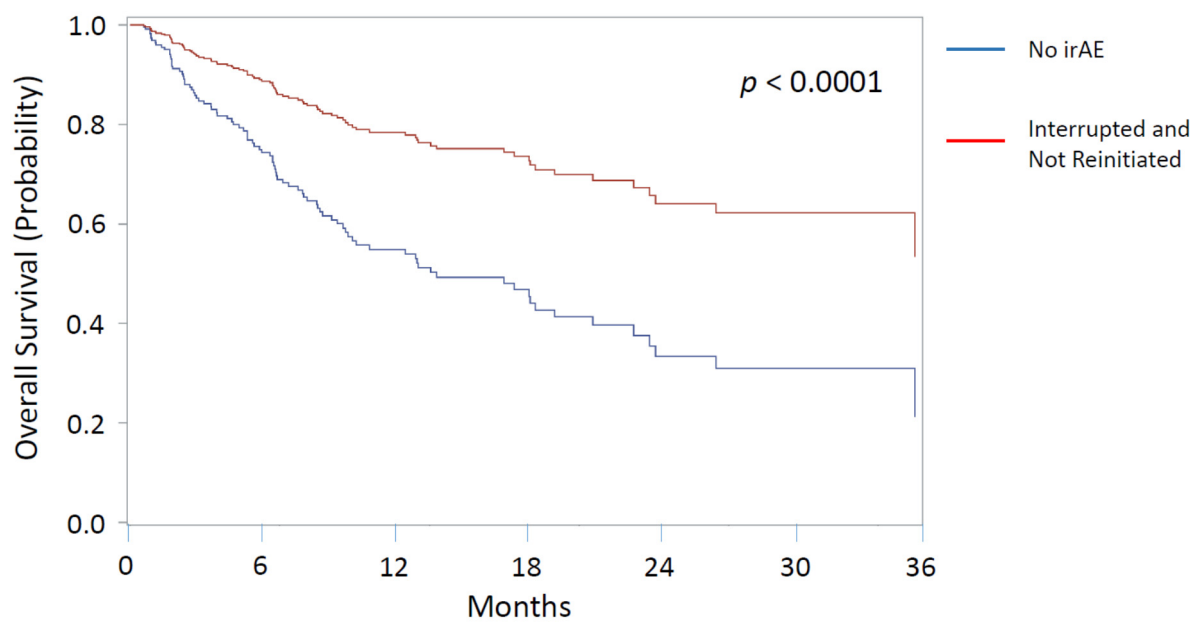

**Figure S1.** Kaplan-Meier Survival Analysis of Study Patients with No irAEs (blue) compared with those ICI “Interrupted and Not Reinitiated (i.e., Discontinued)” (red).

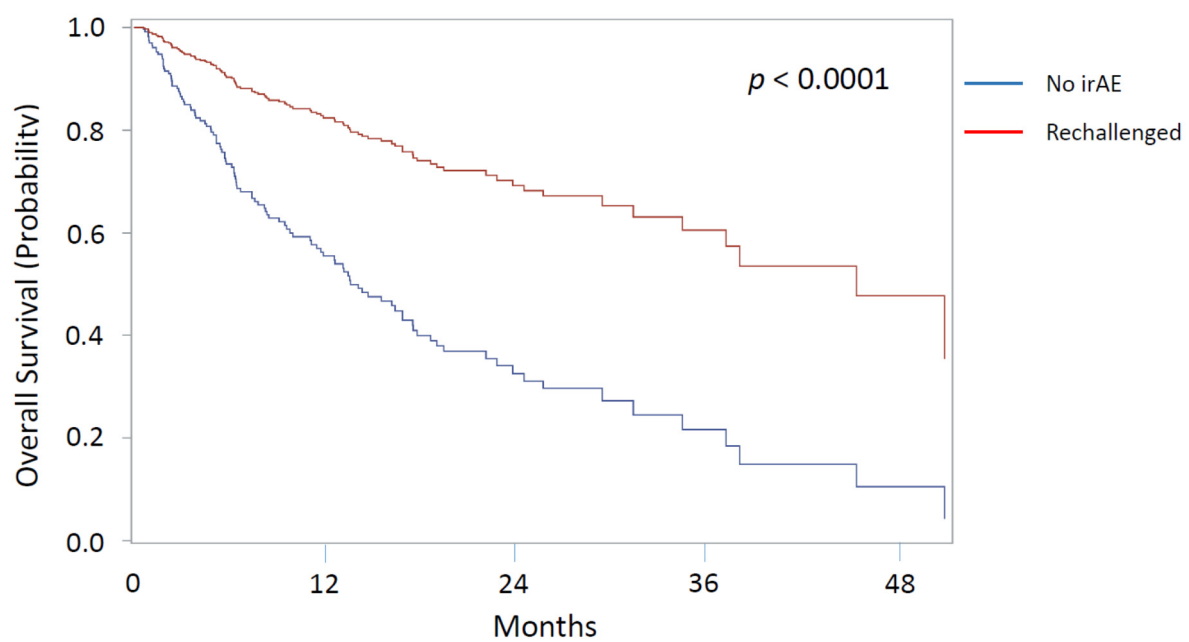

**Figure S2.** Kaplan-Meier Survival Analysis of the Study Patients with No irAEs (blue) compared with the “ICI Rechallenged” Cohort (ICI Reinitiated +/- Interruption) after irAEs.
